# Supplementary material
Source: HighWire-hosted journal article supplement (https://bmjopen.bmj.com/content/9/8/e028248)
Supplement: inline-supplementary-material-10 [file inline-supplementary-material-10.pdf]

**Appendix Figure 4. Heatmap of annual reported incidence of viral hepatitis in total and by different types of hepatitis, different data provinces of China, 2004-2015**

#### 4.1 Viral hepatitis

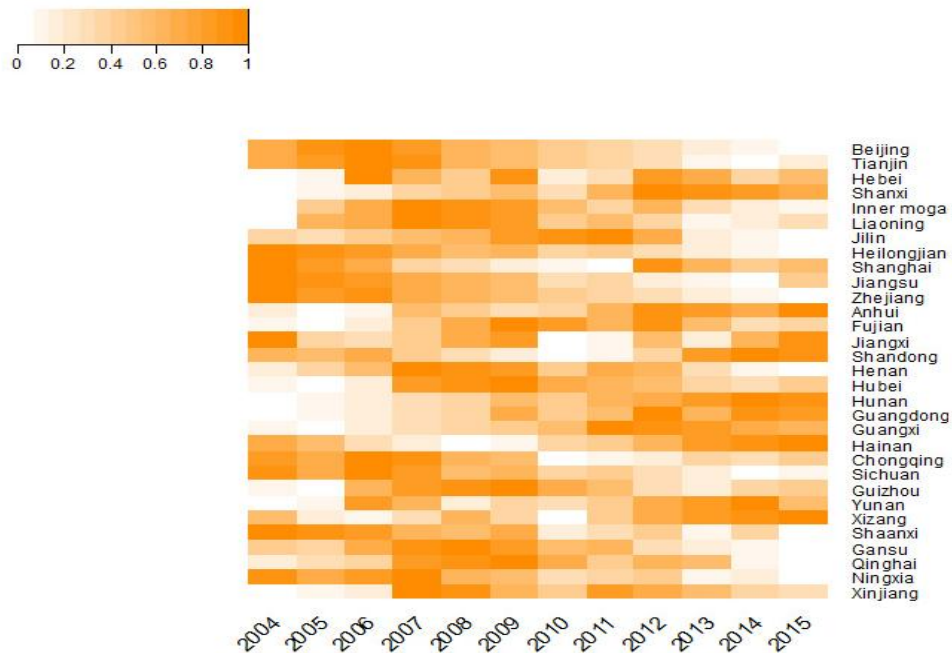

#### 4.2 Hepatitis B

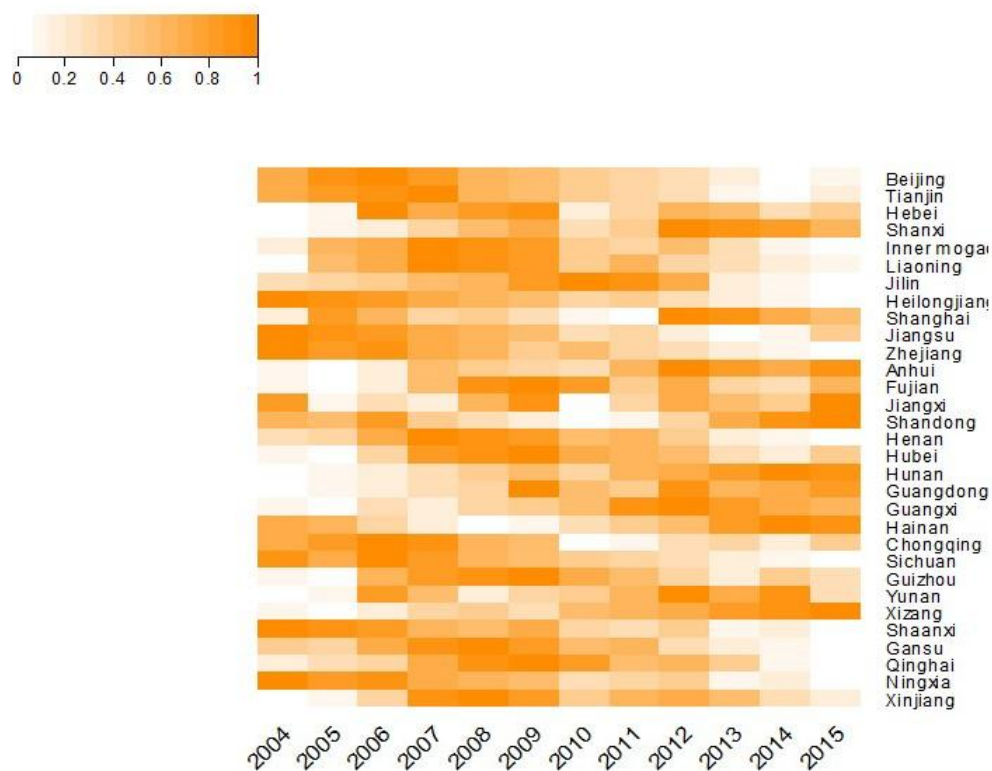

### 4.3 Hepatitis C

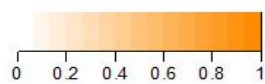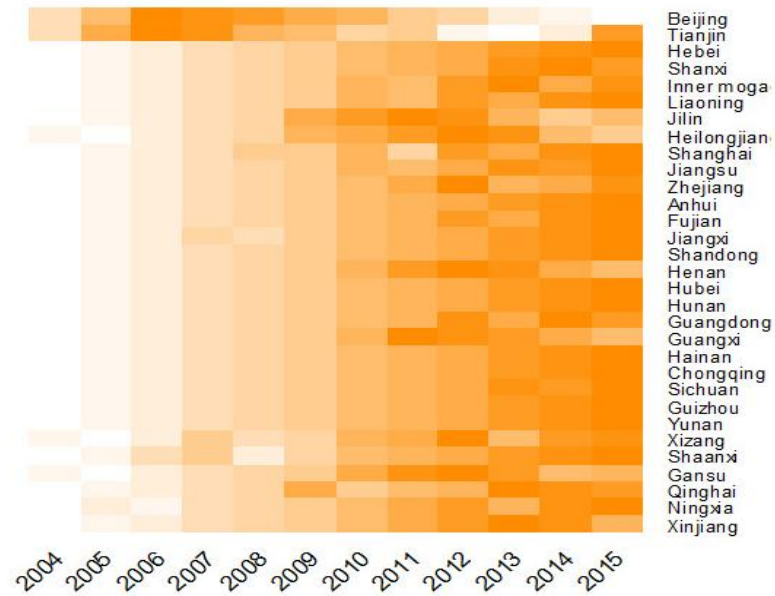

#### 4.4 Hepatitis A

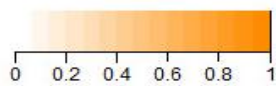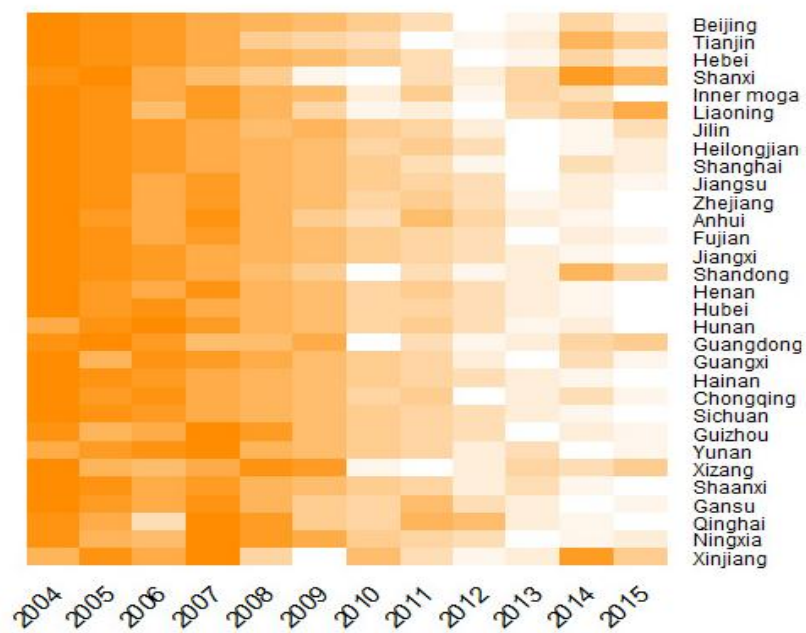

## 4.5 Hepatitis E

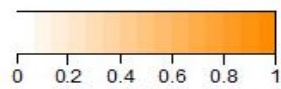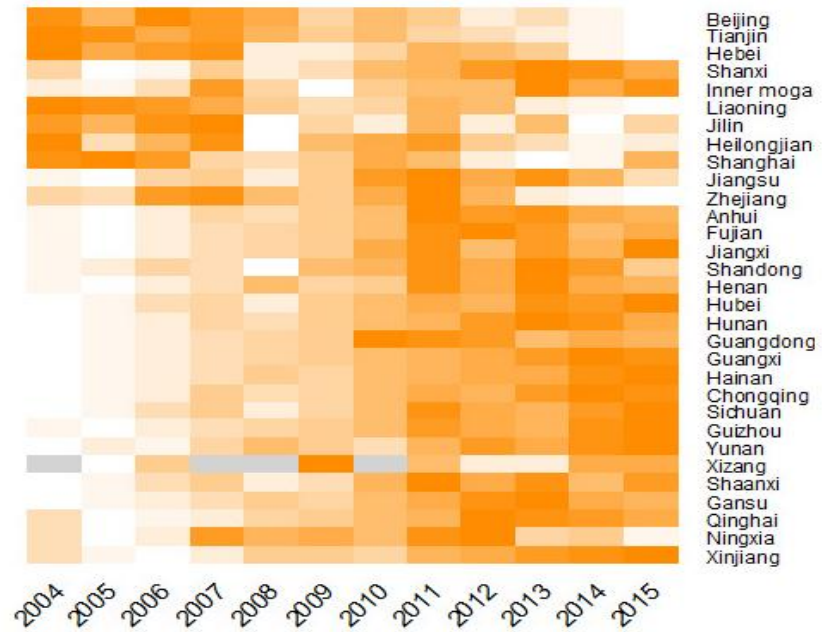

Lightgray: means that data were not available

Data Source: China Center for Disease Control and Prevention. The Public Health Science Data Center. <http://www.phsciencedata.cn/Share/index.jsp>
